# Supplementary material for: Open surgery versus retroperitoneal laparoscopic nephrectomy for renal tuberculosis: a retrospective study of 120 patients
Source: PeerJ. 2016 Nov 29;4:e2708. doi: 10.7717/peerj.2708 (PMC5131615; doi:10.7717/peerj.2708)
Supplement: Data S1 [file peerj-04-2708-s001.xls]

## Sheet: Sheet1
number	sex	age	LUTS	flank pain	urine abnormal	fever	accidently discover	only flank pain	Previous tuberculous history	adhension	ASA	Conversion to open surgery	Perioperative complication	Operation time	Estimated blood loss	Postop hospital days	Transfusion	location	weight	height	BMI	Anemia	Preoperative Scr	Hypertension	Diabetes	surgery
1	1	40	1	1	0	0	0	0	1	1	3	0	0	135	150	7	0	0	85	170	29.4118	1	104	0	0	0
2	0	45	0	1	1	0	0	0	1	0	2	0	1	140	150	9	0	0	65	160	25.3906	0	80	0	0	0
3	1	66	0	1	0	0	0	1	1	1	3	0	1	255	400	22	1	1	59	168	20.9042	0	58	0	0	0
4	1	57	1	0	0	1	0	0	1	1	2	0	0	120	200	8	0	1	70	170	22.9591	1	89	0	0	0
5	0	59	1	1	0	0	0	0	1	0	1	0	0	120	50	7	0	0	61	163	22.9591	0	71	0	0	0
6	0	48	0	0	0	1	0	0	1	0	2	0	0	120	50	7	0	1	55	160	21.4844	1	37.2	0	0	0
7	1	36	1	0	0	0	0	0	1	1	2	1	1	195	400	13	1	1	73	173	24.3911	1	83.3	0	0	1
8	1	34	0	0	0	1	0	0	1	0	2	0	0	160	30	12	0	1	87	182	26.2649	1	81	0	0	1
9	0	33	1	1	1	1	0	0	1	1	2	0	1	245	80	8	0	1	70	160	27.3437	0	62	0	0	1
10	0	26	1	0	0	0	0	0	1	1	2	0	1	250	80	15	0	1	42	158	16.8242	0	74	0	0	1
11	1	66	1	1	0	0	0	0	0	1	2	0	1	135	100	8	0	0	61	164	22.68	0	98	0	0	0
12	1	62	1	0	0	0	0	0	0	0	2	0	0	270	100	9	0	0	66	165	24.2424	0	108	0	0	1
13	1	61	0	1	0	0	0	1	0	0	2	0	1	150	100	11	0	0	60	168	21.2585	0	88	0	0	0
14	1	58	0	0	0	0	0	0	0	1	2	0	1	130	200	9	0	0	65	167	23.3067	0	103	0	0	0
15	1	57	1	0	0	0	0	0	0	1	1	0	0	125	60	10	0	1	75	170	25.9516	0	92.2	0	0	0
16	1	57	1	1	0	0	0	0	0	0	2	0	1	340	400	12	0	0	70	175	22.8571	1	136	0	0	0
17	1	55	0	1	1	0	0	0	0	0	2	0	1	360	100	12	1	0	75	170	25.9516	1	154	0	1	1
18	0	55	1	0	0	0	0	0	0	1	2	0	0	135	100	14	0	0	54	157	21.9076	1	54	0	0	0
19	1	55	1	0	1	1	0	0	0	0	2	0	1	125	50	10	0	0	70	168	24.8016	1	144	0	0	0
20	0	54	0	1	0	0	0	1	0	0	2	0	0	240	30	9	0	1	65	162	24.7676	0	86	1	0	1
21	1	54	0	1	0	0	0	1	0	0	2	0	0	185	20	10	0	1	58	170	20.0692	0	71	0	0	0
22	0	53	0	0	0	0	1	1	0	1	2	0	0	240	400	11	0	1	65	158	26.0375	0	91	0	0	0
23	0	52	0	1	0	0	0	1	0	1	2	0	0	165	100	11	0	1	70	161	27.0051	0	66	1	1	0
24	0	51	1	0	0	1	0	0	0	1	2	0	0	120	100	8	0	1	64	171	21.8871	0	90	0	0	0
25	1	50	1	0	1	0	0	0	0	0	1	0	1	180	150	13	0	0	53	170	18.3391	0	92	0	0	1
26	1	49	1	0	0	0	0	0	0	1	1	0	0	170	100	9	0	0	78	170	26.9896	0	70.6	0	1	0
27	1	48	0	1	0	0	0	1	0	1	2	0	0	285	200	10	0	0	76	160	26.9896	0	129	1	0	1
28	0	47	1	1	0	0	0	0	0	0	3	0	1	150	200	13	1	1	55	156	22.9591	1	78	0	0	1
29	0	46	0	1	0	0	0	1	0	0	2	0	1	180	300	14	0	1	42	132	24.1047	0	53	0	0	1
30	0	46	0	1	0	0	0	1	0	0	2	0	0	340	500	10	0	1	60	160	23.4375	0	87	0	1	1
31	0	45	0	1	0	1	0	0	0	1	3	0	0	145	30	7	0	1	65	160	25.3906	0	57	1	0	1
32	0	44	0	1	1	0	0	0	0	1	2	0	0	175	200	10	0	0	37	148	16.8919	1	65	0	0	0
33	1	42	0	0	1	0	0	0	0	0	2	0	0	180	30	8	0	0	62	173	20.7157	0	104	0	0	0
34	1	41	0	0	0	0	1	1	0	0	2	0	0	120	30	6	0	1	75	175	24.4898	0	73	0	0	0
35	0	40	1	0	0	0	0	0	0	0	2	1	1	160	80	11	0	1	85	170	29.4118	1	69	1	0	1
36	1	40	1	0	1	0	0	0	0	1	2	0	0	160	100	10	0	1	73	170	25.2595	0	97	0	0	0
37	1	38	0	1	0	1	0	0	0	0	2	0	0	160	100	7	0	1	69	168	24.4473	1	70	0	0	1
38	0	37	1	1	1	0	0	0	0	0	2	0	0	144	100	10	0	1	50	160	19.5312	0	66	0	0	0
39	0	36	0	1	0	1	0	0	0	1	3	0	0	150	60	7	0	1	50	158	20.0288	0	85	0	0	0
40	0	35	1	1	0	1	0	0	0	1	2	0	1	120	100	7	0	1	58	162	22.1003	1	76	0	0	0
41	1	35	0	0	0	0	1	1	0	0	2	0	1	95	20	10	0	1	55	160	21.4844	0	97	1	0	0
42	1	35	0	1	0	0	0	1	0	0	2	0	0	91	50	12	0	1	56	165	20.5693	0	74	0	0	1
43	1	35	1	0	1	0	0	0	0	1	2	0	0	150	100	12	0	0	81	165	29.7521	0	66	1	0	1
44	0	34	1	1	0	0	0	0	0	0	2	0	0	120	150	7	0	1	60	160	23.4375	1	67	0	0	0
45	1	33	1	0	0	0	0	0	0	0	2	0	0	160	100	13	0	0	67	169	23.4586	0	74.1	0	0	1
46	1	33	0	0	0	1	0	0	0	0	2	0	0	135	100	9	0	0	60	170	20.7612	0	91	0	0	0
47	1	33	1	0	0	0	0	0	0	0	3	0	0	110	150	10	0	1	55	175	17.9592	1	91	0	0	0
48	0	33	1	0	0	0	0	0	0	0	2	0	0	125	30	11	0	0	50	153	21.3593	0	83	0	0	0
49	1	31	1	0	0	0	0	0	0	0	2	0	0	120	150	7	0	0	65	170	22.4913	0	84	0	0	1
50	1	30	1	1	0	0	0	0	0	1	2	0	1	180	50	7	0	0	60	174	19.8177	0	66	0	0	0
51	0	30	0	1	0	0	0	1	0	0	2	0	0	150	50	14	0	1	66	165	24.2424	0	68	0	0	0
52	1	30	1	1	0	0	0	0	0	0	2	0	0	140	150	13	0	1	62	172	20.9573	0	91	0	0	0
53	0	29	0	1	0	0	0	1	0	0	2	0	1	160	100	10	0	0	54	162	20.5761	1	75	0	0	1
54	0	26	1	0	1	1	0	0	0	0	2	0	1	190	100	9	0	1	60	162	22.8624	0	82	0	0	0
55	0	26	0	1	0	0	0	1	0	0	2	0	1	120	100	12	0	1	45	160	17.5781	1	76	0	0	1
56	0	24	1	1	0	1	0	0	0	1	2	0	1	130	50	8	0	1	40	158	16.0231	1	50.4	0	0	0
57	1	24	1	1	1	0	0	0	0	1	2	0	1	160	50	8	0	1	50	166	18.1449	0	99	0	0	1
58	1	24	0	0	0	1	0	0	0	0	2	0	1	150	200	12	0	0	62	175	20.2449	0	82	0	0	0
59	0	24	0	1	0	1	0	0	0	1	2	0	0	150	50	7	0	0	58	164	21.5645	0	68.7	0	1	1
60	1	21	1	0	0	0	0	0	0	0	2	0	1	145	50	7	0	1	45	167	16.1354	0	86	0	0	1
61	0	20	1	0	0	0	0	0	0	0	1	0	0	200	500	6	1	0	53	168	18.7783	0	68	0	0	1
62	1	19	1	1	0	0	0	0	0	1	2	1	1	255	100	9	0	1	55	160	21.4844	0	64	1	0	1
63	0	17	1	1	0	0	0	0	0	1	2	0	0	150	50	8	0	0	55	165	20.202	1	54	0	0	0
64	1	50	0	1	0	0	0	1	0	1	2	0	0	116	150	12	0	0	66	162	25.1486	0	82	0	0	0
65	0	44	1	0	0	0	0	0	0	0	2	0	0	285	300	8	0	1	60	162	22.8624	0	64	0	0	1
66	1	57	1	0	1	0	0	0	0	1	2	0	0	220	50	9	0	0	66	175	21.551	0	94	0	0	1
67	0	51	0	1	0	0	0	1	0	0	1	0	0	90	150	11	0	0	70	168	24.8016	0	67	0	0	0
68	1	36	1	1	1	1	0	0	0	1	2	1	1	255	400	22	1	0	65	170	22.4913	1	219	0	0	1
69	0	35	1	1	1	1	0	0	0	1	2	0	0	85	30	7	0	0	48	160	18.75	0	86	0	0	0
70	0	35	1	0	0	0	0	0	0	0	2	0	0	185	200	7	0	0	50	158	20.0288	0	112	0	0	0
71	1	26	0	0	1	0	0	0	1	1	2	0	0	150	200	7	0	0	62	173	20.7157	0	129	0	0	1
72	0	47	0	1	0	0	0	0	0	1	2	0	0	225	100	10	1	0	46	160	17.9687	1	65	0	0	1
73	0	42	1	0	0	0	0	0	0	0	2	0	0	171	50	6	0	1	54	160	21.0937	0	106	0	0	1
74	0	25	0	1	0	0	0	1	1	1	1	0	0	135	100	7	0	0	49	150	21.7778	0	57	0	0	0
75	1	32	1	0	1	0	0	0	0	0	2	0	0	165	100	8	0	0	50	165	18.3655	0	91	0	0	1
76	0	54	1	0	0	0	0	0	0	0	2	0	0	100	50	7	0	1	60	158	24.0346	0	85	0	0	1
77	1	51	1	1	0	0	0	0	0	0	2	0	0	140	200	5	0	0	70	166	25.4028	0	111	0	0	1
78	0	23	1	0	0	0	0	0	0	1	2	1	0	229	1000	7	1	0	62	173	20.7157	0	75	0	0	1
79	0	47	1	0	0	0	0	0	0	1	2	0	0	210	100	7	0	1	80	165	29.3848	0	63	0	0	1
80	0	39	0	1	0	1	0	0	1	1	2	1	0	150	400	8	1	0	62	164	23.0518	1	75	0	0	1
81	0	25	1	1	0	1	0	0	0	1	2	0	0	210	150	6	0	1	46	159	18.1955	0	82	0	0	0
82	1	29	1	0	0	1	0	0	0	1	2	0	0	350	100	7	0	0	82	165	30.1194	0	70	0	0	1
83	1	52	1	0	0	0	0	0	0	1	2	0	0	194	200	10	0	0	61	172	20.6193	0	142	0	0	0
84	1	33	1	0	0	0	0	0	1	1	2	0	0	310	200	8	0	1	73	180	22.5309	0	112	0	0	1
85	1	34	1	0	1	1	0	0	0	0	2	0	0	249	80	8	0	1	70	170	24.2215	0	94	0	0	1
86	0	22	1	0	0	1	0	0	1	1	1	0	0	170	50	7	0	1	42	158	16.8242	0	55	0	0	1
87	0	45	1	1	0	1	0	0	1	1	2	0	0	130	60	9	0	0	54	150	24	0	67	0	0	0
88	1	36	1	1	1	0	0	0	0	1	2	0	0	155	100	6	0	1	70	185	20.4529	0	104	0	0	1
89	1	39	1	0	1	0	0	0	0	0	2	0	1	205	50	9	0	0	75	175	24.4898	0	101	0	0	1
90	1	46	0	0	0	0	1	0	0	1	2	0	0	232	200	9	0	1	59	175	19.2653	0	142	0	0	1
91	1	61	0	0	0	0	0	0	0	0	2	0	1	105	300	11	0	0	60	172	20.2812	0	88	0	0	0
92	0	48	0	0	0	0	0	0	1	0	2	0	0	120	80	7	0	1	55	160	21.4844	0	49	0	0	0
93	1	47	1	1	1	0	0	0	1	1	2	0	1	195	100	6	0	1	65	170	22.4913	0	100	0	0	1
94	0	50	0	1	0	0	0	1	0	1	2	0	0	120	50	8	0	1	63	160	24.6094	0	74	0	0	0
95	0	43	0	1	0	0	0	1	0	1	2	0	1	225	50	9	0	0	43	156	17.6693	0	72	1	0	1
96	1	40	1	0	0	0	0	0	0	0	2	0	0	224	240	7	0	0	96	175	31.3469	0	106	0	0	1
97	0	67	1	0	0	0	0	0	0	0	2	0	0	180	100	17	0	0	52	152	22.5069	0	78	0	0	1
98	1	37	1	0	0	0	0	0	0	1	2	0	0	219	200	6	0	1	80	175	26.1224	0	96	0	0	1
99	0	37	1	0	0	0	0	0	0	1	2	0	1	180	200	6	0	0	45	165	16.5289	0	93	0	0	1
100	0	26	1	1	0	0	0	0	0	0	2	0	1	135	200	5	0	1	47	160	18.3594	1	57	0	0	1
101	0	28	1	0	1	0	0	0	0	0	2	0	0	140	50	5	0	1	70	160	27.3437	1	76	0	0	1
102	0	36	1	0	0	1	0	0	0	1	2	0	0	225	200	8	0	1	66	161	25.462	0	56	0	0	1
103	1	62	1	1	0	0	0	0	0	0	2	0	0	160	50	8	0	0	58	170	20.0692	0	94.2	0	0	1
104	1	48	0	1	0	0	0	1	0	1	2	0	0	131	50	6	0	0	70	168	24.8016	0	85	0	0	1
105	1	31	1	0	1	0	0	0	0	1	2	0	1	181	50	10	0	0	83	183	24.7843	0	166	0	0	1
106	0	65	1	1	0	0	0	0	0	1	2	0	0	136	50	8	0	0	55	155	22.8928	0	79	1	0	1
107	0	17	1	0	1	0	0	0	1	0	2	0	0	192	100	7	0	0	40	155	16.6493	1	94	0	0	1
108	1	58	0	0	0	0	1	0	0	0	2	0	0	190	50	6	0	1	65	170	22.4913	0	112	0	0	1
109	1	51	0	1	0	0	0	1	0	0	2	0	1	140	50	18	0	1	68	180	20.9877	0	115	0	0	1
110	1	48	0	1	1	0	0	0	0	1	2	1	1	250	300	11	0	0	75	172	25.3515	0	94	0	0	1
111	1	59	1	1	0	0	0	0	0	1	2	0	0	100	50	4	0	0	90	178	28.4055	0	83	1	0	0
112	1	40	1	1	0	1	0	0	0	0	2	0	0	180	30	9	0	0	77	170	26.6436	0	109	0	0	1
113	0	67	0	1	1	0	0	0	0	1	2	0	0	120	100	8	0	1	53	165	19.4674	0	85	0	0	0
114	1	36	0	0	0	0	1	0	0	0	2	0	1	215	100	7	0	1	80	175	26.1224	0	108	0	0	1
115	1	22	1	1	1	0	0	0	1	0	2	0	0	170	50	6	0	0	50	165	18.3655	0	90	0	0	1
116	1	43	1	0	1	0	0	0	0	0	2	0	0	130	300	7	0	0	65	164	24.1672	0	84	0	0	1
117	0	63	0	1	0	0	0	1	0	1	2	0	0	143	150	12	0	0	65	152	28.1337	0	77	0	0	0
118	1	43	1	0	1	0	0	0	0	0	2	0	0	130	300	7	0	0	65	164	24.1672	0	84	0	0	1
119	1	35	1	0	1	0	0	0	0	0	2	0	0	140	50	8	0	0	60	175	19.5918	0	91	0	0	1
120	1	41	0	0	0	0	1	0	0	1	2	0	0	190	50	6	0	0	70	168	24.8016	0	82	0	0	1
